1 **Behavioral effect of chemogenetic inhibition is directly related to receptor transduction**  
2 **levels in rhesus monkeys**

3

4 Nicholas A. Upright<sup>1,2</sup>, Stephen W. Brookshire<sup>1,2</sup>, Wendy Schnebelen<sup>1,2</sup>, Christienne G.  
5 Damatac<sup>2</sup>, Patrick R. Hof<sup>2</sup>, Philip G. F. Browning<sup>2</sup>, Paula L. Croxson<sup>2</sup>, Peter H. Rudebeck<sup>2</sup>, and  
6 Mark G. Baxter<sup>2\*</sup>

7

8 <sup>1</sup>Contributed equally to this study.

9 <sup>2</sup>Fishberg Department of Neuroscience and Friedman Brain Institute, Icahn School of Medicine  
10 at Mount Sinai, New York, New York, 10029

11

12 \*Corresponding author. Email: [mark.baxter@mssm.edu](mailto:mark.baxter@mssm.edu)

13

14 Abbreviated Title: Prefrontal Chemogenetic Suppression

15

16 29 Pages

17 3 Figures

18 3 Tables

19

20 Abstract: 202 words

21 Introduction: 403 words

22 Discussion: 1227 words

23

24 **Acknowledgments**

25 We are grateful to Scott Russo, Eric Nestler, and Bryan Roth for advice, to Jian Jin for  
26 synthesizing CNO HCl and Compound 21, and the NIMH Chemical Synthesis and Drug Supply

27 Program for providing CNO. This work was supported by the Friedman Brain Institute at the  
28 Icahn School of Medicine at Mount Sinai as well as by NIH grant R21-NS096936.

29

30 **Author Contributions**

31 Designed Research: PRH, PGFB, PLC, PHR, MGB

32 Performed Research: NAU, SWB, WS, CGD, PGFB, PLC, PHR, MGB

33 Analyzed Data: NAU, SWB, WS, CGD, MGB

34 Wrote Paper: NAU, SWB, WS, PLC, PHR, MGB

35

36 The authors declare no competing financial interests.

37

38

39

40 **Abstract**

41 We used inhibitory DREADDs (Designer Receptors Exclusively Activated by Designer Drugs) to  
42 reversibly disrupt dorsolateral prefrontal cortex (dlPFC) function in male macaque monkeys.  
43 Monkeys were tested on a spatial delayed response task to assess working memory function  
44 after intramuscular injection of either clozapine-*N*-oxide (CNO) or vehicle. CNO injections given  
45 before DREADD transduction were without effect on behavior. rAAV5/hsyn-hM4Di-mCherry was  
46 injected bilaterally into the dlPFC of five male rhesus monkeys, to produce neuronal expression  
47 of the inhibitory (Gi-coupled) DREADD receptor. We quantified the percentage of DREADD-  
48 transduced cells using stereological analysis of mCherry-immunolabeled cells. We found a  
49 greater number of immunolabeled neurons in monkeys that displayed CNO-induced behavioral  
50 impairment after DREADD transduction compared to monkeys that showed no behavioral effect  
51 after CNO. Even in monkeys that showed reliable effects of CNO on behavior after DREADD  
52 transduction, the number of prefrontal neurons transduced with DREADD receptor was on the  
53 order of 3% of total prefrontal neurons counted. This level of histological analysis facilitates our  
54 understanding of behavioral effects, or lack thereof, after DREADD vector injection in monkeys.  
55 It also implies that a functional silencing of a relatively small fraction of dlPFC neurons, albeit in  
56 a widely distributed area, is sufficient to disrupt spatial working memory.

57

58

59

60

61

62

63

64

65

66 **Significance Statement**

67 Cognitive domains such as working memory and executive function are mediated by the  
68 dorsolateral prefrontal cortex (dlPFC). Impairments in these domains are common in  
69 neurodegenerative diseases as well as normal aging. The present study sought to measure  
70 deficits in a spatial delayed response task following activation of viral-vector transduced  
71 inhibitory DREADD (Designer Receptor Exclusively Activated by Designer Drug) receptors in  
72 rhesus macaques and compare this to the level of transduction in dlPFC using stereology. We  
73 found a significant relationship between the extent of DREADD transduction and the magnitude  
74 of behavioral deficit following administration of the DREADD actuator compound clozapine-*N*-  
75 oxide (CNO). These results demonstrate it will be critical to validate transduction to ensure  
76 DREADDs remain a powerful tool for neuronal disruption.

77

78

79 **Introduction**

80 Chemogenetic techniques such as DREADDs (Designer Receptors Exclusively Activated by  
81 Designer Drugs) allow for the remote manipulation of neuronal activity. They can be targeted to  
82 distinct cell populations defined by anatomical, connectional, or other phenotypic characteristics  
83 and are activated by systemic administration of an otherwise inert drug (Armbruster et al.,  
84 2007); (Roth, 2016). The most commonly used DREADD system employs the clozapine  
85 metabolite clozapine-N-oxide (CNO) to activate a modified muscarinic acetylcholine receptor  
86 which is no longer sensitive to acetylcholine as an agonist (Armbruster et al., 2007). In principle,  
87 CNO has no endogenous receptors or other physiological effects and is inert in the absence of  
88 the DREADD receptor, and because the DREADD receptor has no endogenous ligand it is inert  
89 until CNO or another DREADD actuator compound is administered. The DREADD receptor can  
90 be linked to different G-protein signal transduction mechanisms, meaning that it is possible to  
91 stimulate or inhibit neuronal activity via this system (Roth, 2016).

92

93 Chemogenetic techniques would be particularly powerful if implemented in nonhuman primates.  
94 They would allow for experimental designs with reversible manipulation of neuronal activity  
95 across large anatomical regions that are beyond the reach of electrical or optogenetic  
96 stimulation (Ohayon et al., 2013) and on time scales consistent with cognitive testing or  
97 behavioral neurophysiology. The success of these techniques in modifying behavior when  
98 DREADD receptors are expressed in rostromedial caudate (Nagai et al., 2016) or orbitofrontal  
99 cortex (Eldridge et al., 2015) has been demonstrated. To effectively employ these technologies,  
100 there is a need for studies that not only demonstrate the efficacy of DREADDs in non-human  
101 primates, but also validate the technique and illustrate challenges to address in the future. Our  
102 goals in the present study were twofold. First, we sought to implement DREADDs in nonhuman  
103 primates in a different neocortical area, the dorsolateral prefrontal cortex (dlPFC), using a  
104 sensitive behavioral probe of dlPFC function, the spatial delayed response task (Goldman and

105 Rosvold, 1970; Bachevalier and Mishkin, 1986). Second, upon observing variability in outcomes  
106 after DREADD-bearing viral vector injections into dIPFC, we applied unbiased stereological  
107 counting techniques to postmortem histological analysis of dIPFC in order to determine the  
108 relationship between the extent of DREADD receptor transduction within dIPFC with the  
109 magnitude of behavioral effect caused by DREADD receptor activation. As these studies  
110 extended over a period of several years and additional information became available about the  
111 use of chemogenetic techniques in monkeys, we incorporated additional control conditions into  
112 our design.

113

## 114 **Materials and Methods**

115

### 116 **Subjects**

117 Five male rhesus macaques, denoted cases A, B, P, T, and Z, aged between 44 and 76 months  
118 old and weighing 4.5 to 9.4 kg at the time of surgery, were used for this study. Monkeys were  
119 socially housed indoors in single sex groups. Daily meals, consisting of a ration of monkey chow  
120 and a variety of fruits and vegetables, was given within transport cages once testing was  
121 completed, except on weekends when they were fed in their home cages. Within the home  
122 cages water was available ad libitum. Environmental enrichment, in the form of play objects or  
123 small food items, was provided daily in the home cages. All procedures were approved by the  
124 Icahn School of Medicine Institutional Animal Care and Use Committee and conform to NIH  
125 guidelines on the use of non-human primates in research.

126

### 127 **Apparatus**

128 Testing was performed within a Wisconsin General Testing Apparatus (WGTA). The WGTA is a  
129 small enclosed testing area where the experimenter can manually interact with the monkey  
130 during testing. Monkeys were trained to move from the home cage enclosure to a metal

131 transport cage, which was wheeled into the WGTA. The experimenter was hidden from the  
132 monkey's view by a one-way mirror, with only the experimenter's hands visible. A sliding tray  
133 with two food wells could be advanced within reach of the monkey, with a pulley-operated  
134 opaque black screen that could be lowered to separate the tray from the monkey.

135

### 136 **Behavioral Testing**

137 Training on the delayed response task followed Bachevalier and Mishkin (1986) and Croxson et  
138 al. (2011). Monkeys were shown a small food reward (a peanut, M&M, raisin, or craisin,  
139 depending on each monkey's preference), which was placed in one of two food wells on a test  
140 tray. The left/right location of the reward across trials was always determined based on a  
141 pseudorandomized, counterbalanced sequence. An opaque black screen was then lowered  
142 between test tray and the monkey for a predefined delay period. The screen was subsequently  
143 raised and the test tray was advanced within reach of the monkey. During initial shaping, the  
144 monkeys were taught to displace a flat, gray tile covering one of the two small food wells. Once  
145 monkeys readily displaced the tiles, they were advanced along three stages of training, with 24-  
146 30 trials per session. Once each monkey successfully completed the third stage of training to  
147 criterion, experimental testing began, consisting of sessions of 24 trials. On each trial, if the  
148 monkey reached for the correct well it was allowed to take the reward, otherwise the tray was  
149 quickly pulled back before the monkey could reach for the other well.

150

151 For the first stage of training, both the baited and non-baited wells were covered, and the tray  
152 advanced for the monkey's choice. Trials were repeated until the monkey chose correctly. The  
153 second stage included a brief ("0 second") lowering of the opaque black screen between the  
154 monkey and the food tray (the screen was lowered and then raised immediately) before the tray  
155 was presented to the monkey for choice. Each monkey advanced from the first to the second  
156 stage, and from the second to the third, after completing two consecutive sessions at 90%

157 correct or better. The third stage was the same as the second with longer delays (1-5 s) of the  
158 opaque screen. Each monkey started at a 1-s delay and was advanced to a 1-s longer delay  
159 upon 90% correct or better performance, and was reduced 1-s (to a minimum of 1-s) upon  
160 performance of less than 90% correct. Once 90% correct performance or better was achieved in  
161 one session at the 5-s delay, training was complete and experimental testing began.

162  
163 In the experimental task, each trial consisted of one of four possible delays (5, 10, 15, and 20 s)  
164 varied pseudorandomly across trials such that each delay occurred 6 times in each test session.  
165 For case T, 5 delays were used (5, 10, 15, 20, 30 s), each occurring 6 times in each test  
166 session. Monkeys continued with the variable delay task for the remainder of the experiment.  
167 Drug injections began once each monkey reached stable performance on the experimental task.  
168 Typically, drug injections were given one or two days per week, with vehicle or no-injection  
169 testing on other days, and at least one day of rest given after CNO injections. Training on the  
170 delayed response task was conducted after surgery in two cases (A and B) and before in the  
171 three others (cases P, T, and Z).

172

### 173 **Drugs**

174 Clozapine-N-oxide (CNO) was obtained through the National Institute of Mental Health  
175 Chemical Synthesis Program. DMSO was obtained from Sigma, and 0.1 M phosphate buffered  
176 saline (PBS) was prepared in-house. CNO was first dissolved in DMSO, and then diluted in PBS  
177 to a final concentration of 15 mg/mL in 15/85 DMSO/PBS (v/v). Alternately, CNO was converted  
178 to the hydrochloride salt CNO HCl in the laboratory of Dr. Jian Jin (Icahn School of Medicine at  
179 Mount Sinai). Compound 21 was obtained from Dr. Jian Jin. For administration, these drugs  
180 were weighed to compose the appropriate dose for each monkey and dissolved in 1.5 ml PBS.  
181 The final solutions were filtered through a 0.2  $\mu$ m syringe filter before injection. CNO/CNO HCl  
182 was given at 10 or 20 mg/kg, i.m. During drug testing, monkeys received 240 mg Vitamin C



183 orally each day (chewable supplements), in an effort to inhibit hepatic conversion of CNO to  
184 clozapine (Pirmohamed et al., 1995). Drug injections were administered one hour prior to the  
185 behavioral session on testing days. Because of the large volume of CNO injections required to  
186 achieve 20 mg/kg dose, injections were split between several i.m. injection sites. To maintain  
187 behavioral performance while limiting the number of times monkeys had to receive injections,  
188 vehicle injection sessions were interspersed with test sessions that were not preceded by  
189 injection. The number of CNO injection sessions for each monkey was limited mainly by  
190 availability of CNO, owing to the large doses required for each CNO test session. **Table 1**  
191 shows the schedule of injections and CNO dosing that each animal received during the course  
192 of post-operative testing.

193

#### 194 **Surgery**

195 Surgical methods for bilateral injection of DREADD AAV into the dlPFC followed Croxson et al.  
196 (2011). Aliquots (100  $\mu$ l) of rAAV5/hsyn-hM4Di-mCherry were obtained from the University of  
197 North Carolina at Chapel Hill Vector Core at 2.4 (cases A, B), 3.5 (case T), or  $4.1 \times 10^{12}$  (cases  
198 P, Z) particles/ml. AAV was stored at  $-80^{\circ}$  C until immediately before injection, at which time it  
199 was thawed on wet ice and loaded into 10  $\mu$ l Hamilton syringes for intracortical injection. A new  
200 aliquot of AAV was used for each surgical procedure (1 or 2, depending on the number of  
201 injections performed) and leftover AAV was not refrozen. Surgical procedures took place in a  
202 dedicated operating suite under strict aseptic conditions. On the day of surgery, each monkey  
203 was sedated with ketamine (10 mg/kg) and dexmedetomidine (0.01 mg/kg), transported to the  
204 surgical preparation area, the head shaved and cleansed, and intubated with an endotracheal  
205 tube. Anesthesia was maintained with sevoflurane (2-4%, to effect) in 100% oxygen. The skin  
206 and galea were incised and retracted, a single bone flap turned over the frontal lobes bilaterally,  
207 and the dura reflected over the dlPFC in each hemisphere. Injections (1  $\mu$ l) of AAV were made  
208 into each hemisphere under visual guidance through an operating microscope, with care taken

209 to place the beveled tip of the Hamilton syringe containing the AAV at an oblique angle to the  
210 pial surface. Injections were spaced approximately 2 mm apart and covered the dorsal and  
211 ventral borders of the principal sulcus, extending dorsally towards the midline bounded  
212 anteriorly by the tip of the principal sulcus, posteriorly by a line connecting the posterior tip of  
213 the principal sulcus and the anterior tip of the ascending limb of the arcuate sulcus, and dorsally  
214 by an approximate line extending from the anterior tip of the arcuate sulcus anteriorly towards  
215 the front of the skull, parallel to the midline. Each case received injections in the left and right  
216 hemispheres as follows: Case A, 49 and 54; Case B, 57 and 50; Case P, 45 and 66; Case T, 36  
217 and 53; Case Z, 86 and 98. Variation in number of injections was related to individual  
218 differences in brain size, sulcal morphology, and degree of exposure. Upon completion of  
219 injections in each hemisphere the dura was closed with Vicryl sutures; when injections in both  
220 hemispheres were completed the bone flap was replaced and held in place with loose Vicryl  
221 sutures, the galea and skin were closed in layers, and anesthesia was discontinued. The  
222 monkey was extubated when a swallowing reflex was present, returned to the home cage, and  
223 monitored continuously until normal motor behavior resumed. Each monkey remained  
224 individually housed for a few days after surgery until the attending veterinarian determined it  
225 could rejoin the social group. Postoperative treatment included buprenorphine (0.01 mg/kg i.m.  
226 every 8 hours) and meloxicam (0.2 mg/kg i.m. every 24 hours) for analgesia for 1-5 days and 3-  
227 5 days respectively, based on veterinary guidance, as well as cefazolin (25 mg/kg i.m. every 24  
228 hours) for 5 days and dexamethasone sodium phosphate (0.4-1 mg/kg, every 12-24 hours) for 5  
229 days on a descending dose schedule. Postoperative behavioral data collection began a  
230 minimum of 2 weeks after surgery. CNO test sessions were carried out 324-349 days  
231 postoperatively in case A, 325-365 days in case B, 40-103 days in case P, 65-133 days in case  
232 T, and 42-44 days in case Z.

233

234 **Histology**

235 *Tissue Extraction:* At the conclusion of behavioral testing, each monkey was sedated with  
236 ketamine (10 mg/kg) i.m., intubated, and an intravenous line placed for i.v. administration of a  
237 terminal anesthetic dose of sodium pentobarbital (100 mg/kg). Upon loss of corneal reflex, the  
238 chest cavity was opened, the descending aorta clamped, and transcardial perfusion was  
239 initiated with 1% paraformaldehyde (PFA) for 90 seconds, and then 4% PFA for ~15 minutes,  
240 via a cannula placed in the ascending aorta. Brains were extracted and placed in 4% PFA and  
241 kept at 4°C overnight, before being placed in sucrose/sodium azide solutions. The brains were  
242 cryoprotected in increasing concentrations of sucrose, 10%, 20% and 30%, with 0.1% of sodium  
243 azide added to all as a preservative agent. Brains were kept at 4°C in 30% sucrose/0.1%  
244 sodium azide until ready to be sectioned.

245

246 *Sectioning:* Brains were removed from the cryoprotectant solution and the brainstem and  
247 posterior part of the occipital lobe were blocked to given a level surface to sit the brain upright. A  
248 sliding microtome and freezing stage were used to section the brain. Coronal sections were cut  
249 at 50 µm thickness, and a 1:10 set was collected throughout the frontal lobes. Sets were  
250 collected into 0.1 M PBS w/ 0.1% azide for storage at 4°C, or into a cryoprotectant solution  
251 consisting of glycerol, ethylene glycol, PBS, and distilled water (30/30/10/30 v/v/v/v,  
252 respectively) for storage at -80°C.

253

254 *Immunohistochemistry:* Sections were taken from the 4°C storage sets and probed for mCherry  
255 immunoreactivity. Endogenous peroxidase activity was quenched with 0.3% hydrogen peroxide  
256 (v/v) with 20% methanol (v/v) in PBS. Alternating sections were blocked with 5% normal goat  
257 serum (VectaShield, S-1000), and then incubated in anti-mCherry rabbit polyclonal primary  
258 antibody in blocking solution (Abcam, ab167453; 1:50,000 dilution). The secondary consisted of  
259 a goat-anti-rabbit biotin-conjugated antibody (Jackson Immunoresearch; #111-065-003; 1:500  
260 dilution) in 2% normal goat serum, followed by the VectaShield ABC Peroxidase kit

261 (VectaShield, PK-6100) with the modifications to the ABC kit instructions; 2 drops solution A and  
262 2 drops solution B per 10 ml PBS with 0.1% Triton X-100. Finally, labeling was visualized using  
263 the DAB kit (VectaShield, SK-4100) with nickel enhancement according to manufacturer's  
264 recommendations. Sections were counterstained with cresyl violet and mounted with DPX.

265

## 266 **Stereology**

267 The dIPFC region of interest was identified using a 5x objective. The borders of the dIPFC were  
268 defined as the dorsal edge of the cingulate sulcus medially, the ventral lip of the principal sulcus  
269 laterally, and the anterior and posterior tips of the principal sulcus anteriorly and posteriorly. This  
270 region encompassed most of area 46 and 9/46d, and portions of areas 9/46v, 8b, 8Ad, and 9,  
271 as defined by Petrides and Pandya (1999). As such it approximated the dIPFC ablations made  
272 in other studies (Baxter et al., 2008; Bachevalier and Mishkin, 1986) and included more cortex  
273 than was targeted intraoperatively, because our injections did not extend into the midline.

274

275 Standard unbiased stereology was performed on sections using a Zeiss Apotome.2 light  
276 microscope equipped with a Q-Imaging digital camera, a motorized stage, and Stereo  
277 Investigator software (MBF Bioscience, Williston, VT). Cresyl violet and mCherry-positive cells  
278 were identified using the soma as the counting target and numbers were estimated using the  
279 optical fractionator probe following the process described in West et al. (1991). Pilot studies  
280 were performed to determine appropriately sized sampling grids and counting frames. Six to  
281 seven sections were used for each animal. Both cresyl and mCherry-stained tissue were  
282 counted using a x40 oil-immersion objective lens within a counting frame of  $100 \times 100 \times 10 \mu\text{m}^3$   
283 with the dissector top guard volume extended  $1 \mu\text{m}$  below the tissue section surface. The  
284 sampling grid for cresyl cells was  $700 \times 700 \mu\text{m}^2$  and the sampling grid for mCherry-positive  
285 cells was  $400 \times 400 \mu\text{m}^2$ . The cell body was used as the counting object for cells that fell within  
286 the dissector or across its inclusion planes. Neurons were differentiated from glia by cell

287 morphology, identified with the cresyl violet stain, and the presence of a well-defined nucleolus.

288 Coefficients of error were calculated for each region to ensure minimal variance due to

289 sampling.

290

291 Representative histological images are shown in **Figure 1**. mCherry immunostaining was

292 patchy, as expected. We did not quantify mCherry staining outside of the dlPFC; however, we

293 observed some staining outside the region of interest in four out of the five cases. These stained

294 cells may be attributed to unintended deeper penetrations during surgery as a result of the the

295 handheld syringe technique. Cases A, B, and Z showed small patches of mCherry-positive cells

296 in medial prefrontal cortex, mostly localized around the cingulate sulcus. Cases A and P showed

297 several instances of stained cells in orbital prefrontal cortex, concentrated around the medial

298 orbital sulcus region. No case exhibited staining in thalamus and posterior parietal cortex.

299 Although four out of the five cases demonstrated variable degrees of ectopic staining, there was

300 no obvious relationship between this ectopic staining and behavioral effects of CNO

301 administration, with ectopic staining being present in the same cortical regions in both monkeys

302 that showed effects of CNO administration post-surgery and those that did not.

303

### 304 **Statistical Analysis**

305 Because of variability across monkeys in the effect of CNO on performance after surgery, and

306 because we were limited in the number of test sessions we could carry out with each monkey

307 due to constraints on our supply of CNO and the large quantity of drug required to generate a

308 sufficient dose for each behavioral test session, we adopted a case study-type approach to data

309 analysis. For each monkey, we determined first the impact of vehicle injections and pre/post

310 surgery on performance, using a 2 x 2 ANOVA on percent correct performance across vehicle

311 and no-injection test sessions before and after surgery, treating each session as a unit of

312 analysis within each monkey. No monkey showed an effect of vehicle injection relative to

313 baseline sessions without vehicle injection, and for only one monkey (case Z) did performance  
314 differ between pre- and postoperative testing (performance was better after surgery than  
315 before). We used the single-case t-test approach of Crawford and Howell (1998) to evaluate  
316 each drug test session compared to postoperative vehicle injection sessions for each monkey,  
317 because the number and timing of drug injection test sessions varied across monkeys as we  
318 accumulated data and our experimental protocol evolved based on communication with other  
319 research groups that were carrying out studies with DREADDs in monkeys concurrently with  
320 ours. We evaluated significant impairments in drug testing sessions as one-tailed p-values < .05  
321 generated from each t-test. Because we expected only impairments following drug  
322 administration a priori, we judged one-tailed tests to be appropriate. In any case, the evaluation  
323 of statistical significance of any individual test session is only a proxy for the absolute magnitude  
324 of the drug effect in terms of an increase in errors committed during the test session, which is  
325 readily apparent from the raw behavioral data.

326

327 To adjust for baseline differences in performance, we determined an aggregate "deficit score"  
328 based on postoperative DREADD receptor activation (Croxson et al., 2012). This score was  
329 calculated as a percent of maximal deficit in the spatial delayed response task, providing a  
330 single score characterizing each monkey's behavioral impairment. We computed the correlation  
331 between this behavioral deficit score and the percentage of neurons in each monkey's DIPFC  
332 that was transduced by DREADD receptors, based on the stereological quantification.

333

## 334 **Results**

### 335 *The effects of DREADD-mediated DIPFC inhibition on spatial working memory*

336 A summary of behavioral data for all five cases can be found in **Table 2**. Two monkeys  
337 demonstrated robust impairments in the spatial working memory task after injection of CNO  
338 (Cases B and P), one monkey demonstrated moderate impairment (Case T), and two monkeys

339 showed no difference in spatial working memory function after CNO administration (Cases A  
340 and Z). It is interesting in Cases B and P that they were unimpaired during their final CNO test  
341 session, perhaps suggesting that with repeated dosing they were able to compensate for the  
342 impact of temporary neuronal inhibition following systemic CNO. Mean performance for vehicle  
343 and CNO sessions for each monkey is shown in **Figure 2**, both across all sessions in each  
344 condition (**Figure 2A**) and broken down by delay (**Figure 2B**). Given the limited number of total  
345 trials at each delay, we did not carry out data analyses at each delay individually, but it is  
346 interesting that case T appears to show deficits only at the longest delay tested.

347

#### 348 *The effects of CNO on behavior*

349 As a control measure for the effects of CNO on behavior, we obtained data on CNO injections  
350 prior to AAV injection surgery in two cases (one session each in cases P and Z). Case P, who  
351 showed marked effects of 20 mg/kg CNO after surgery, showed no effect of 20 mg/kg CNO  
352 preoperatively (70.8% correct 73.4% correct on vehicle,  $t = -0.33$ ,  $p = 0.37$ ). Case Z, who did not  
353 show effects of 20 mg/kg CNO after surgery, actually did worse on his pre-surgery CNO test  
354 compared to vehicle performance, 83.3% correct vs 95.8% correct on vehicle,  $t = -2.14$ ,  $p =$   
355  $0.029$ , although this comparison is complicated by overall better postoperative performance  
356 compared to preoperative performance in this monkey, which elevates his mean vehicle score.  
357 In any case, this monkey showed no impairments in two further 20 mg/kg CNO sessions done  
358 after surgery, arguing against general nonspecific effects of CNO on behavior. Case T had one  
359 session with Compound 21 preoperatively, and scored 96% correct, suggesting Compound 21  
360 also had no discernible behavioral effect in the absence of DREADD expression.

361

#### 362 *The relationship between DREADD receptor transduction in dIPFC and spatial working memory* 363 *performance*

364 We conducted unbiased stereological counting on histological sections from the dIPFC of each  
365 animal to determine the relationship between behavioral performance in the spatial delayed  
366 response task and the proportion of neurons transduced with inhibitory DREADD receptor.  
367 Monkeys that demonstrated behavioral impairments showed an increased level of mCherry  
368 staining compared to monkeys that demonstrated no behavioral change after CNO injection. We  
369 found that there was a significant positive correlation between percent of positive mCherry-  
370 immunolabeled neurons in the dIPFC and performance on the spatial delayed response task  
371 after CNO administration calculated as a percent deficit score  $[(\text{mean baseline} - \text{mean}$   
372  $\text{CNO})/(\text{mean baseline} - \text{chance})]$ ,  $r = 0.8745$ ,  $p = .0196$ , illustrated in **Figure 3**.

373

### 374 **Discussion**

375 In some monkeys who received hm4Di DREADD AAV injections into the dIPFC, we were able  
376 to obtain a reliable behavioral deficit in a spatial working memory task following systemic  
377 injections of CNO. In monkeys where we examined CNO injections preoperatively, no impact on  
378 behavior was seen. There was a monotonic relationship between the extent of DREADD  
379 receptor transduction within the dIPFC and the magnitude of behavioral impairment following  
380 DREADD receptor activation. Thus, there is a biological basis to apparently stochastic effects of  
381 DREADD transduction in rhesus monkeys. In the two monkeys with the largest behavioral  
382 deficits following DREADD receptor activation, only ~3% of neurons within the dIPFC were  
383 transduced with DREADD receptors. These findings have implications for the implementation of  
384 chemogenetic approaches in nonhuman primates, as well as for the neurophysiology of  
385 cognitive functions of the prefrontal cortex.

386

387 Our goal in initiating this study was to determine, with a simple behavioral task dependent on a  
388 cortical area with a straightforward surgical approach, whether we could achieve a substantial  
389 behavioral deficit by activation of hm4Di DREADDs on par with what could be achieved by a



390 cortical ablation or neurotoxic lesion. This would be a critical prelude to using chemogenetic  
391 methods in studies where the consequence of neuronal inhibition (or activation) would be less  
392 clearly determined a priori. We were only partially successful in accomplishing this goal. In two  
393 cases (B and P) we achieved substantial behavioral impairments with DREADD receptor  
394 activation, but in the other three cases, effects were equivocal. The basis of this variability was  
395 clearly related to the extent of DREADD receptor transduction within the dIPFC. Nagai et al.  
396 (2016) reported a similar phenomenon, where by in cases where systemic CNO failed to  
397 produce a behavioral deficit in their reward sensitivity task, they also did not observe significant  
398 displacement of <sup>11</sup>C-clozapine in PET scans following CNO administration. Because they made  
399 this determination in vivo, they were able to make additional AAV injections in an effort to  
400 increase DREADD receptor expression and thereby achieve behavioral effects of CNO  
401 administration. Extent of DREADD receptor transduction appeared to be unrelated to surgical  
402 parameters such as number of injections in each case or lot of viral vector used. We did not  
403 determine the presence of AAV neutralizing antibodies in our monkeys prior to surgery; these  
404 have been reported after AAV injections into the central nervous system for delivery of  
405 optogenetic constructs (Mendoza et al., 2017), although it is not clear whether the presence of  
406 neutralizing antibodies would impede transduction by AAV (Gray et al., 2013).

407  
408 Both monkeys that showed marked behavioral impairments after 20 mg/kg CNO appeared to  
409 adapt, with performance in each monkey's final test session at this dose not differing  
410 significantly from baseline. Perhaps with a relatively small population of neurons in dIPFC being  
411 functionally silenced by systemic CNO, the monkeys were able to compensate after repeated  
412 behavioral testing on the delayed response task under CNO. This could not have been related  
413 to level of DREADD expression as a function of time post-transduction, because the interval  
414 between surgery and test for case B was quite long and was much briefer for case P. It has  
415 also been shown that significant desensitization of DREADDs apparently does not occur in vivo

416 (Roth, 2016; Roman et al., 2016). Nonetheless, this may suggest some additional limitations on  
417 using functional silencing with chemogenetic techniques as a tool to investigate behavioral  
418 deficits after inhibitions of specific populations of neurons.

419  
420 Although CNO is present in the cerebrospinal fluid (CSF) in monkeys (Eldridge et al., 2015;  
421 Raper et al., 2017), it has also become apparent recently that CNO is actively transported out of  
422 brain parenchyma by P-glycoprotein (Raper et al., 2017). Thus CSF concentrations may not  
423 reflect CNO availability at neuronally expressed DREADD receptors. Moreover, conversion of  
424 CNO to clozapine occurs in monkeys, producing concentrations of clozapine sufficient to bind to  
425 DREADD receptors (Raper et al., 2017). A recent study in rodents suggests that the mechanism  
426 of hM3/hM4 DREADD receptor activation is exclusively via conversion of CNO to clozapine  
427 (Gomez et al., 2017). We saw no effect of CNO injections on behavior in our monkeys prior to  
428 DREADD receptor expression so we do not think positive effects of CNO, where observed, are  
429 explained merely by clozapine interaction with non-DREADD receptors. It remains a logical  
430 possibility that individual differences in CNO penetration of the central nervous system, or of  
431 conversion of CNO to clozapine, influence the behavioral effectiveness of DREADD receptor  
432 activation. Because we did not determine CSF levels of CNO/clozapine in our monkeys, we  
433 cannot address this possibility. As suggested by Gomez et al. (2017), future studies might use  
434 low doses of clozapine, that do not produce behavioral effects on their own, as DREADD  
435 actuators rather than CNO. There is an alternative non-CNO actuator, compound 21 (Chen et  
436 al., 2015) that is a potential alternative to CNO/clozapine. We only had the opportunity to carry  
437 out limited experiments with compound 21 in this study, but it appears comparable to CNO in  
438 potency. Another possibility for future studies is using an alternative DREADD receptor system  
439 such as that based on modification of the kappa opioid receptor (KORD-DREADD; (Vardy et al.,  
440 2015). However, this approach has limited application in monkeys at the moment because the  
441 limited solubility of the KORD-DREADD ligand salvanorin B makes dosing impractical.

442 Despite the technical challenges encountered, we were able to impair spatial delayed response  
443 performance, a task dependent on intact dlPFC, by DREADD receptor activation in monkeys in  
444 which ~3% of prefrontal neurons were transduced with the hM4Di DREADD receptor. This  
445 implies that inhibition of a relatively small fraction of dlPFC neurons is sufficient to produce  
446 substantial behavioral deficits in the delayed response task. We were surprised by this finding,  
447 expecting before we initiated these experiments that we would need to affect much greater  
448 proportions of cortical neurons before behavioral impairments would become apparent. It is  
449 possible that the nature of neural coding in the spatial delayed response task, hypothesized to  
450 involve competition among microcircuits encoding possible goal locations (Arnsten et al., 2012)  
451 makes it particularly vulnerable to disruption of a small number of neurons in the network. This  
452 may not be the case for the involvement of other cortical/subcortical structures, in terms of the  
453 extent of disruption that would be required to impair behavior. For example, spatial navigation  
454 functions of the hippocampus apparently can be supported with only a small "minislab" of intact  
455 hippocampal tissue (Moser et al., 1995), suggesting that a much greater degree of transduction  
456 within the hippocampus would be required to produce behavioral deficits via an inhibitory  
457 DREADD receptor mechanism. Purely as an experimental design consideration, it will be  
458 critical, as in other lesion/inactivation studies of behavior, to take advantage of control tasks  
459 whose sensitivity to target structures is known, as well as dissociation methodology (Olton,  
460 1991) to guard against errors in interpretation of functional deficits following neuronal  
461 inactivation (or activation). It is critical moving forward with these chemogenetic techniques that  
462 we proceed with both optimism and caution and support future findings with rigorous means of  
463 quantification to better verify these methods. As these methods develop, it will be important to  
464 continue to evaluate them in parallel with other approaches to interfering with neuronal activity,  
465 including pharmacological inactivations and permanent lesions, in order to obtain convergent  
466 evidence on the functions of neural systems for complex behavior in the primate brain.  
467

468 **References**

- 469 Armbruster BN, Li X, Pausch MH, Herlitze S, Roth BL (2007) Evolving the lock to fit the key to  
470 create a family of G protein-coupled receptors potently activated by an inert ligand.  
471 Proceedings of the National Academy of Sciences 104:5163–5168.
- 472 Arnsten AFT, Wang MJ, Paspalas CD (2012) Neuromodulation of Thought: Flexibilities and  
473 Vulnerabilities in Prefrontal Cortical Network Synapses. Neuron 76:223–239.
- 474 Bachevalier J, Mishkin M (1986) Visual recognition impairment follows ventromedial but not  
475 dorsolateral prefrontal lesions in monkeys. Behavioural Brain Research 20:249–261.
- 476 Baxter MG, Gaffan D, Kyriazis DA, Mitchell AS (2008) Dorsolateral prefrontal lesions do not  
477 impair tests of scene learning and decision-making that require frontal-temporal  
478 interaction. European Journal of Neuroscience 28:491–499.
- 479 Chen X, Choo H, Huang X-P, Yang X, Stone O, Roth BL, Jin J (2015) The First Structure–  
480 Activity Relationship Studies for Designer Receptors Exclusively Activated by Designer  
481 Drugs. ACS Chemical Neuroscience 6:476–484.
- 482 Crawford JR, Howell DC (1998) Regression Equations in Clinical Neuropsychology: An  
483 Evaluation of Statistical Methods for Comparing Predicted and Obtained Scores. Journal  
484 of Clinical and Experimental Neuropsychology 20:755–762.
- 485 Croxson PL, Browning PGF, Gaffan D, Baxter MG (2012) Acetylcholine Facilitates Recovery of  
486 Episodic Memory after Brain Damage. Journal of Neuroscience 32:13787–13795.
- 487 Croxson PL, Kyriazis DA, Baxter MG (2011) Cholinergic modulation of a specific memory  
488 function of prefrontal cortex. Nature Neuroscience 14:1510–1512.

- 489 Eldridge MAG, Lerchner W, Saunders RC, Kaneko H, Krausz KW, Gonzalez FJ, Ji B, Higuchi  
490 M, Minamimoto T, Richmond BJ (2015) Chemogenetic disconnection of monkey  
491 orbitofrontal and rhinal cortex reversibly disrupts reward value. *Nature Neuroscience*  
492 19:37–39.
- 493 Goldman PS, Rosvold HE (1970) Localization of Function Within the Dorsolateral Prefrontal  
494 Cortex of the Rhesus Monkey. *Experimental Neurology* 27:291–304.
- 495 Gomez JL, Bonaventura J, Lesniak W, Mathews WB, Sysa-Shah P, Rodriguez LA, Ellis RJ,  
496 Richie CB, Harvey BK, Dannals RF, Pomper MG, Bonci A, Michaelides M (2017)  
497 Chemogenetics revealed: DREADD occupancy and activation via converted clozapine.  
498 *Science* 357:503–507.
- 499 Gray SJ, Kalburgi SN, McCown TJ, Samulski RJ (2013) Global CNS gene delivery and evasion  
500 of anti-AAV-neutralizing antibodies by intrathecal AAV administration in non-human  
501 primates. *Gene therapy* 20:450.
- 502 Mendoza SD, El-Shamayleh Y, Horwitz GD (2017) AAV-mediated delivery of optogenetic  
503 constructs to the macaque brain triggers humoral immune responses. *Journal of*  
504 *Neurophysiology* 117:2004–2013.
- 505 Moser MB, Moser EI, Forrest E, Andersen P, Morris RG (1995) Spatial learning with a minislab  
506 in the dorsal hippocampus. *Proceedings of the National Academy of Sciences* 92:9697–  
507 9701.
- 508 Nagai Y et al. (2016) PET imaging-guided chemogenetic silencing reveals a critical role of  
509 primate rostromedial caudate in reward evaluation. *Nature Communications* 7:13605.

- 510 Ohayon S, Grimaldi P, Schweers N, Tsao DY (2013) Saccade Modulation by Optical and  
511 Electrical Stimulation in the Macaque Frontal Eye Field. *Journal of Neuroscience*  
512 33:16684–16697.
- 513 Olton DS (1991) Experimental Strategies to Identify the Neurobiological Bases of Memory:  
514 Lesions. In: *Learning and Memory*, pp 441–466. Elsevier. Available at:  
515 <http://linkinghub.elsevier.com/retrieve/pii/B978012474993150016X> [Accessed March 27,  
516 2018].
- 517 Petrides M, Pandya DN (1999) Dorsolateral prefrontal cortex: comparative cytoarchitectonic  
518 analysis in the human and the macaque brain and corticocortical connection patterns:  
519 Dorsolateral prefrontal cortex in human and monkey. *European Journal of Neuroscience*  
520 11:1011–1036.
- 521 Pirmohamed M, Williams D, Madden S, Templeton E, Park BK (1995) Metabolism and  
522 Bioactivation of Clozapine by Human Liver. *The Journal of Pharmacology and*  
523 *Experimental Therapeutics* 272:984–990.
- 524 Raper J, Morrison RD, Daniels JS, Howell L, Bachevalier J, Wichmann T, Galvan A (2017)  
525 Metabolism and Distribution of Clozapine-N-oxide: Implications for Nonhuman Primate  
526 Chemogenetics. *ACS Chemical Neuroscience* Available at:  
527 <http://pubs.acs.org/doi/abs/10.1021/acscemneuro.7b00079> [Accessed June 28, 2017].
- 528 Roman CW, Derkach VA, Palmiter RD (2016) Genetically and functionally defined NTS to PBN  
529 brain circuits mediating anorexia. *Nature Communications* 7:11905.
- 530 Roth BL (2016) DREADDs for Neuroscientists. *Neuron* 89:683–694.

531 Vardy E et al. (2015) A New DREADD Facilitates the Multiplexed Chemogenetic Interrogation of  
532 Behavior. *Neuron* 86:936–946.

533 West MJ, Slomianka L, Gundersen HJG (1991) Unbiased stereological estimation of the total  
534 number of neurons in the subdivisions of the rat hippocampus using the optical  
535 fractionator. *The Anatomical Record* 231:482–497.

536



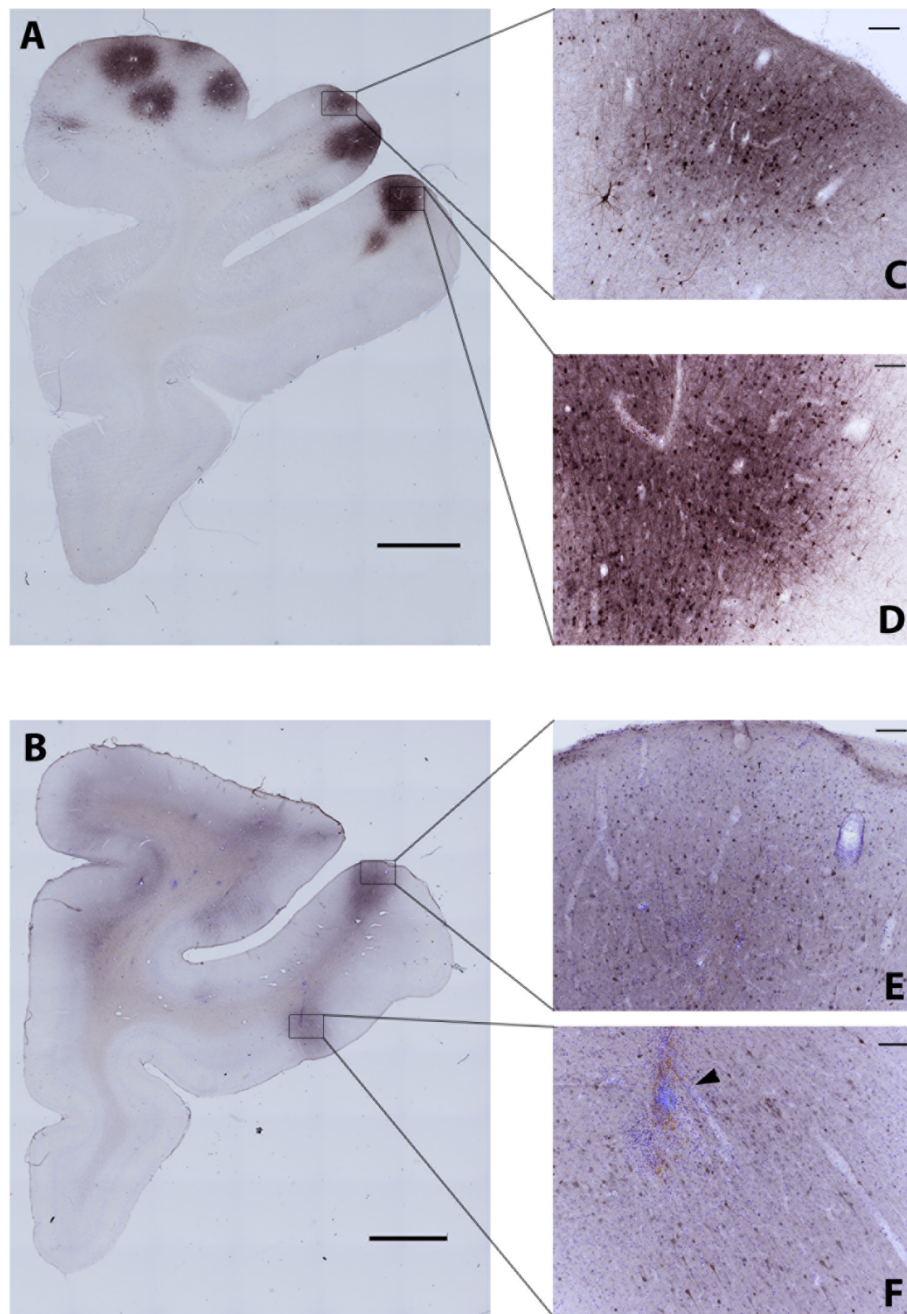

537

538 **Figure 1.** Transduction pattern in two example cases. **A**, DREADD transduction pattern shown  
539 in PFC of Case P. Regions within black squares are shown at higher magnification in **C** and **D**.

540 **B**, DREADD transduction from PFC of Case Z. **C-D**, DREADD patches along principal sulcus  
541 from same slice as in **A**. Shown at 10x magnification. **E-F**, DREADD patches from same slice as



542 in B. Shown at 10x magnification. Note DREADD-positive cells near principal sulcus (**E**) as well  
543 as orbital frontal cortex (**F**). Black arrowhead denotes presence of needle track. Scale bars: **A**  
544 and **B**, 2500  $\mu\text{m}$ ; **C-F**, 100  $\mu\text{m}$ .

545

546

547

548

549

550

551

552

553

554

555

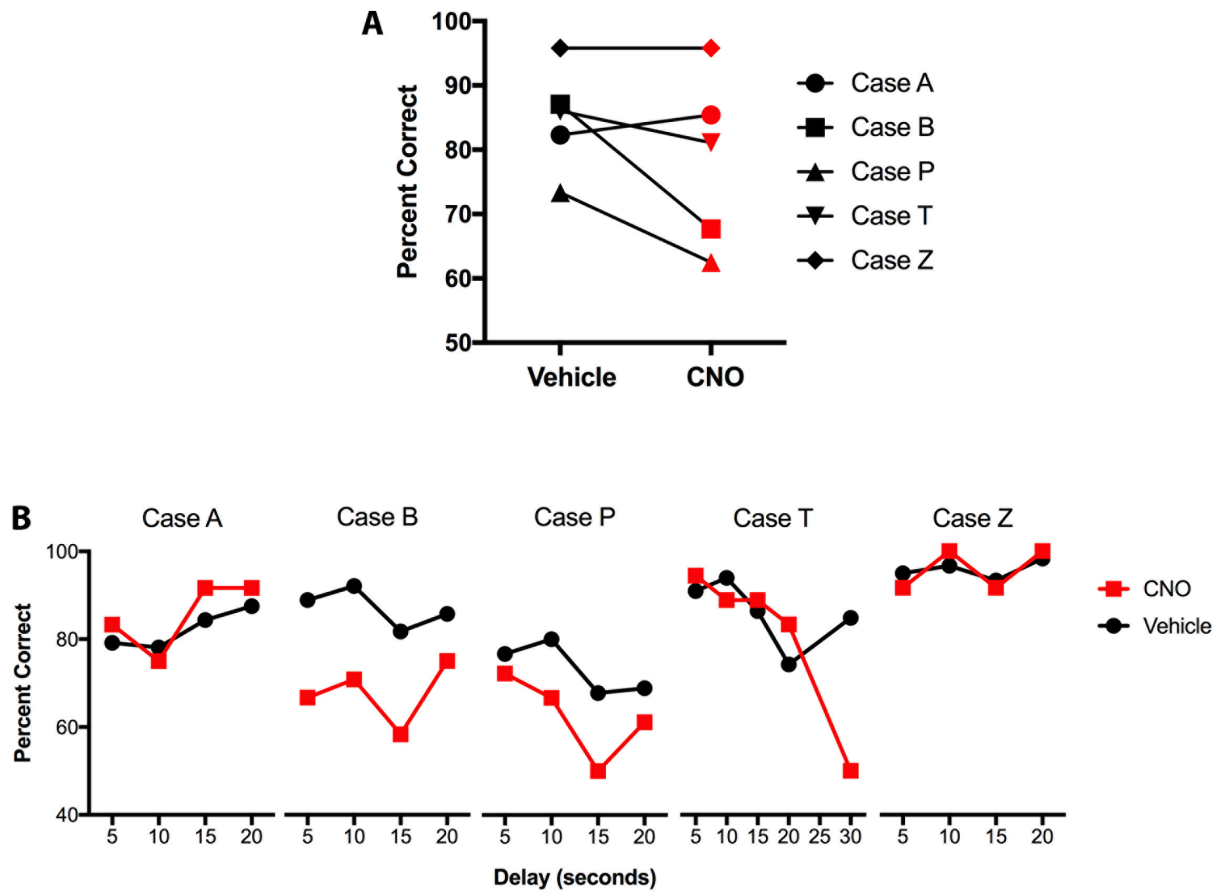

556

557 **Figure 2.** Spatial delayed response performance for vehicle and CNO sessions. **A**, Mean  
558 performance across all sessions for each case. **B**, Performance for each case broken down by  
559 delay (5, 10, 15, and 20 s). Case T had an additional trial time of 30 s.

560

561

562

563

564

565

566

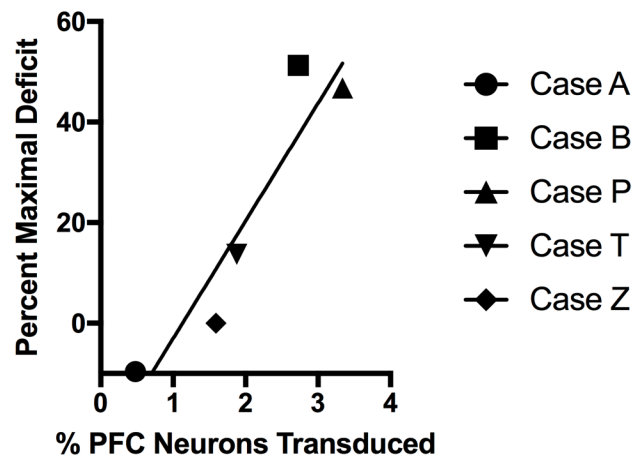

567

568 **Figure 3.** Significant positive correlation between stereological and behavioral measures.

569 Percent of prefrontal neurons transduced with DREADD was significantly correlated with

570 performance on the spatial delayed response task, calculated here as an aggregate deficit

571 score from postoperative DREADD receptor activation ( $r = 0.8745$ ,  $p = 0.0196$ ).

572

573

574

575

576

577

578

579

580

581

582

583

584

585 **Table 1. Surgery and injection schedule during the course of post-operative behavioral**  
586 **testing**

| Case | Surgery Date | CNO (20 mg/kg) Test Session |          |          |          |
|------|--------------|-----------------------------|----------|----------|----------|
|      |              | 1                           | 2        | 3        | 4        |
| A    | 12/11/13     | 11/04/14                    | 11/25/14 |          |          |
| B    | 12/10/13     | 11/04/14                    | 11/07/14 | 11/25/14 | 12/10/14 |
| P    | 04/09/15     | 05/19/15                    | 05/21/15 | 07/21/15 |          |
| T    | 08/02/16     | 10/06/16                    | 11/06/16 | 12/13/16 |          |
| Z    | 04/07/15     | 05/19/15                    | 05/21/15 |          |          |

587

588

589

590

591

592

593

594

595

596

597

598

599

600

601

602

**Table 2. Behavioral data for pre-operative and post-operative testing sessions**

| Case | Vehicle Percent Correct (sd) | Pre-Op/Post-Op | Drug (Dose)      | Percent Correct | t-statistic (p-value) |
|------|------------------------------|----------------|------------------|-----------------|-----------------------|
| A    | 82.3 (13.3)                  | Post-Op        | CNO (10 mg/kg)   | 83.3            | 0.07 (0.47)           |
|      |                              | Post-Op        | CNO (20 mg/kg)   | 83.3            | 0.07 (0.47)           |
|      |                              | Post-Op        | CNO (20 mg/kg)   | 87.6            | 0.38 (0.35)           |
| B    | 86.4 (8.5)                   | Post-Op        | CNO (10 mg/kg)   | 83.3            | -0.35 (0.37)          |
|      |                              | Post-Op        | CNO (20 mg/kg)   | 70.8            | -1.79 (0.04)          |
|      |                              | Post-Op        | CNO (20 mg/kg)   | 54.2            | -3.70 (0.001)         |
|      |                              | Post-Op        | CNO (20 mg/kg)   | 58.3            | -3.22 (0.002)         |
| P    | 73.5 (7.8)                   | Post-Op        | CNO (20 mg/kg)   | 87.5            | 0.13 (0.45)           |
|      |                              | Pre-Op         | CNO (20 mg/kg)   | 70.8            | -0.33 (0.37)          |
|      |                              | Post-Op        | CNO (20 mg/kg)   | 58.3            | -1.87 (0.04)          |
|      |                              | Post-Op        | CNO (20 mg/kg)   | 58.3            | -1.87 (0.04)          |
|      |                              | Post-Op        | CNO (10 mg/kg)   | 62.5            | -1.36 (0.10)          |
|      |                              | Post-Op        | CNO (20 mg/kg)   | 70.8            | -0.33 (0.37)          |
|      |                              | Post-Op        | CNO (20 mg/kg)   | 75.0            | 0.19 (0.43)           |
| T    | 86.1 (5.3)                   | Pre-Op         | C21 (20 mg/kg)   | 96.0            | 1.78 (0.05)           |
|      |                              | Pre-Op         | CNO (24.5 mg/kg) | 92.0            | 1.066 (0.16)          |
|      |                              | Post-Op        | CNO (20 mg/kg)   | 93.3            | 1.30 (0.11)           |
|      |                              | Post-Op        | CNO (20 mg/kg)   | 56.7            | -5.27 (<0.0005)       |
|      |                              | Post-Op        | CNO (20 mg/kg)   | 93.3            | 1.30 (0.11)           |
|      |                              | Post-Op        | C21 (20 mg/kg)   | 80.0            | -1.09 (0.15)          |
|      |                              | Post-Op        | C21 (20 mg/kg)   | 76.7            | -1.69 (0.06)          |
| Z    | 95.8 (5.6)                   | Post-Op        | C21 (20 mg/kg)   | 90.0            | 0.71 (0.25)           |
|      |                              | Pre-Op         | CNO (20 mg/kg)   | 83.3            | -2.14 (0.03)          |
|      |                              | Post-Op        | CNO (20 mg/kg)   | 91.7            | -0.71 (0.25)          |
|      |                              | Post-Op        | CNO (20 mg/kg)   | 100.0           | 0.72 (0.25)           |

All sessions for each case are in chronological order. CNO = clozapine-*N*-oxide; C21 = Compound 21
